# Supplementary material
Source: PubMed Central journal article supplement (PMC1794398)

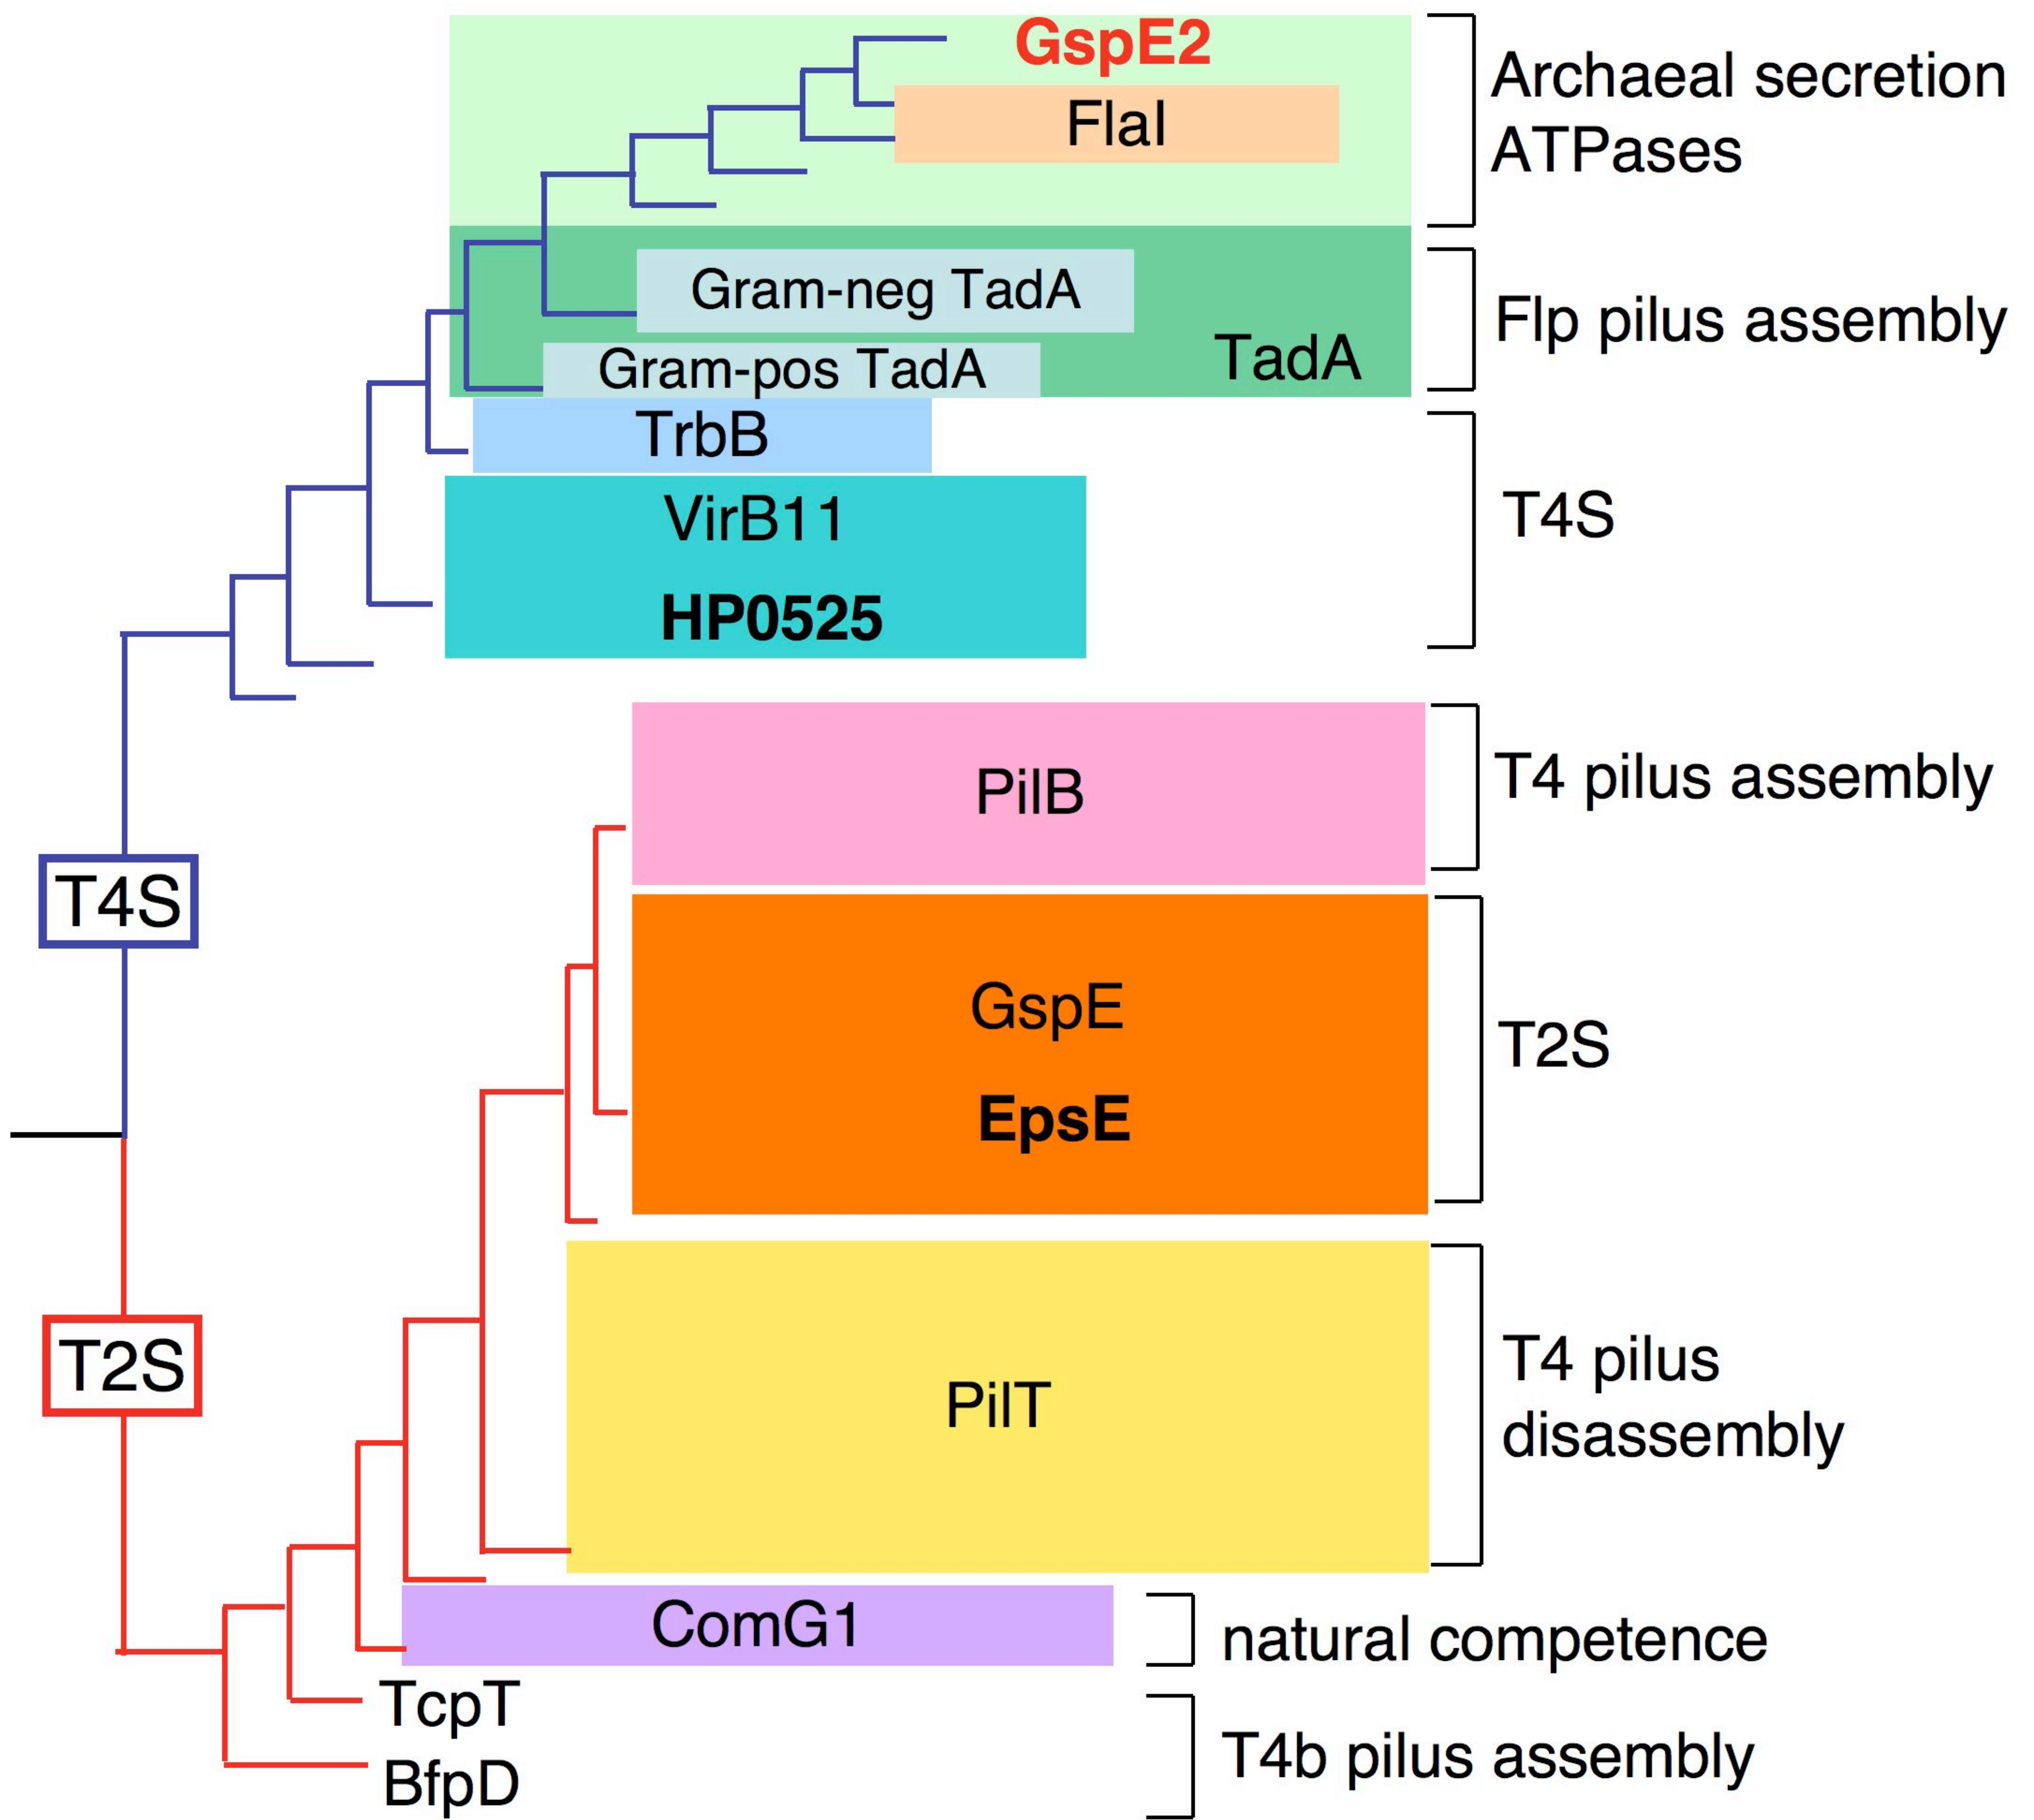

Supplementary figure 1. Yamagata and Tainer

Supplement: 7601544s2.pdf [file 7601544s2.pdf]

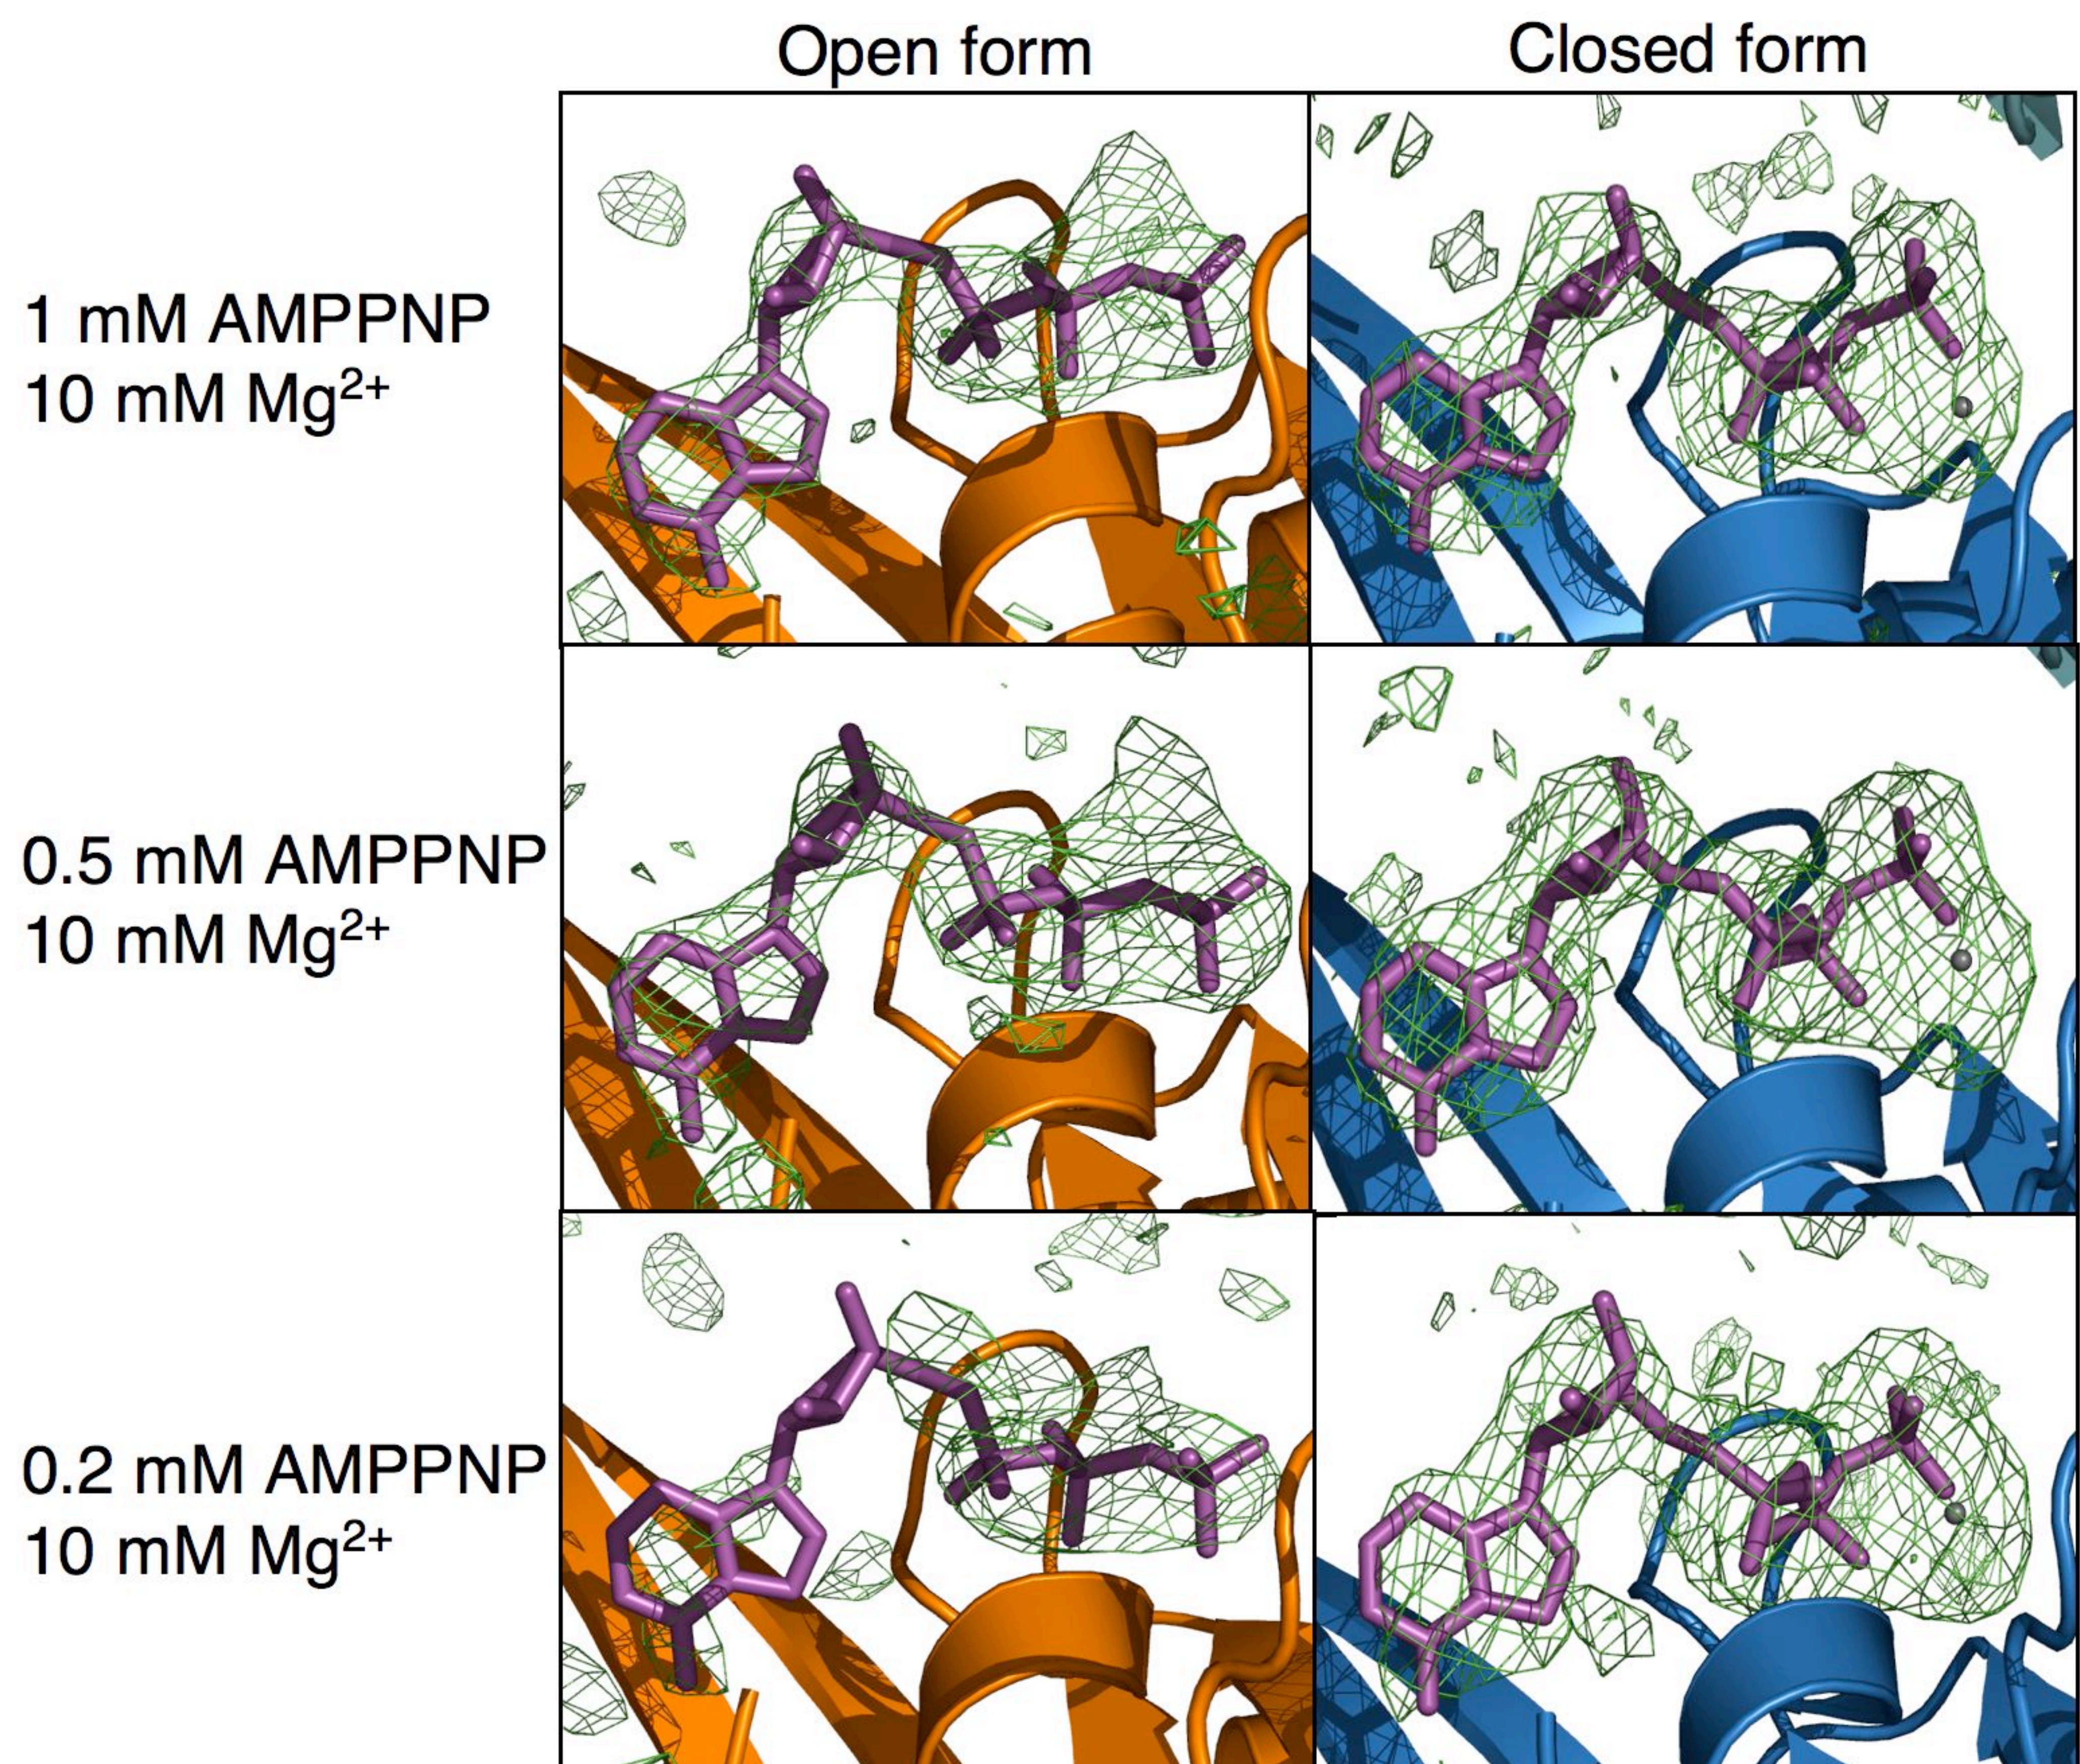

Supplementary figure 2. Yamagata and Tainer

Supplement: 7601544s3.pdf [file 7601544s3.pdf]

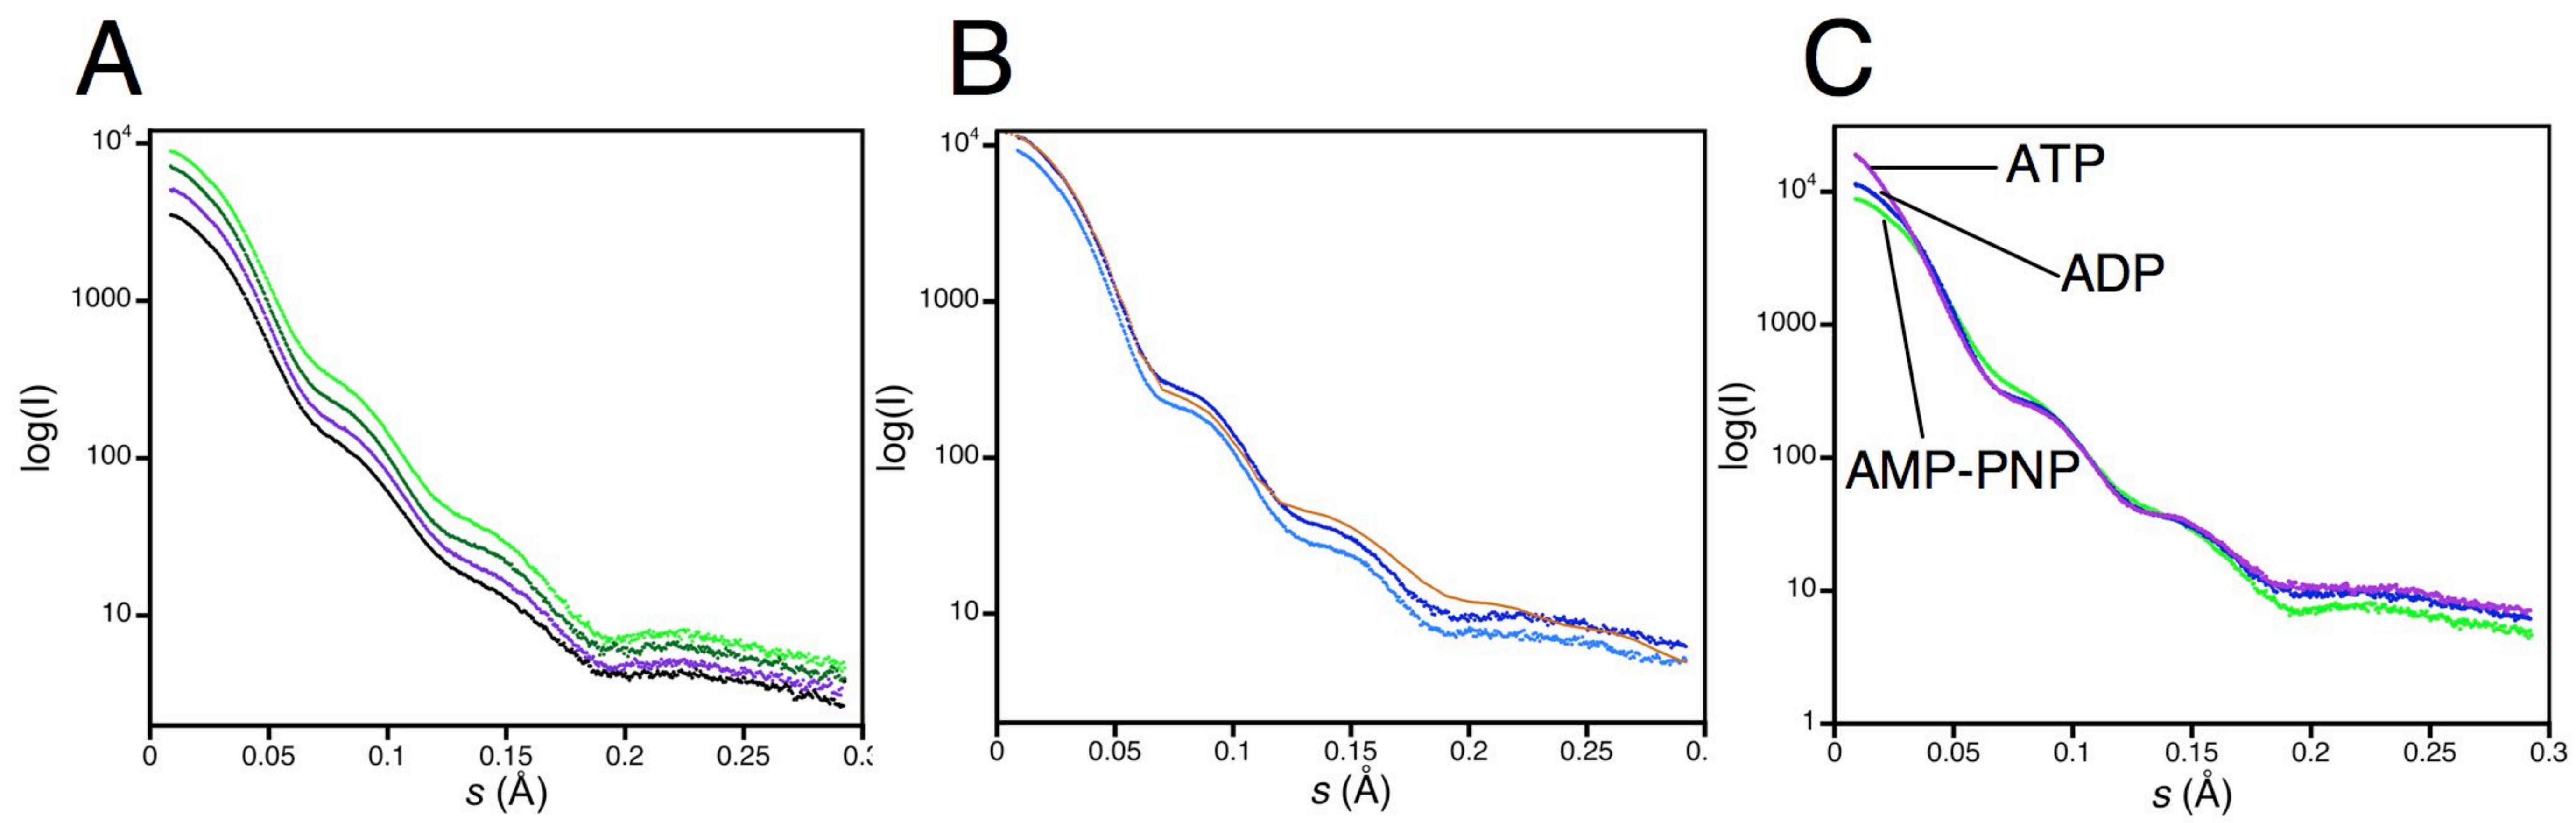

Supplementary figure 3. Yamagata and Tainer

Supplement: 7601544s4.pdf [file 7601544s4.pdf]
